# Supplementary material for: Comparative Proteomics Reveals the Difference in Root Cold Resistance between Vitis. riparia × V. labrusca and Cabernet Sauvignon in Response to Freezing Temperature
Source: MDPI journal article supplement (doi:10.3390/plants11070971), 2022-04-02
Supplement: s1 [file s1]

Figure supplemental legends

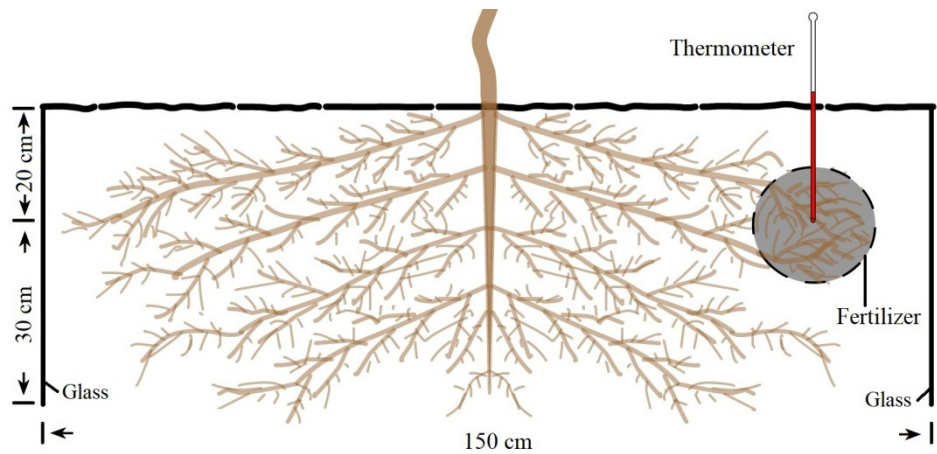

Figure S1. The model image of glass placed to separate the roots.

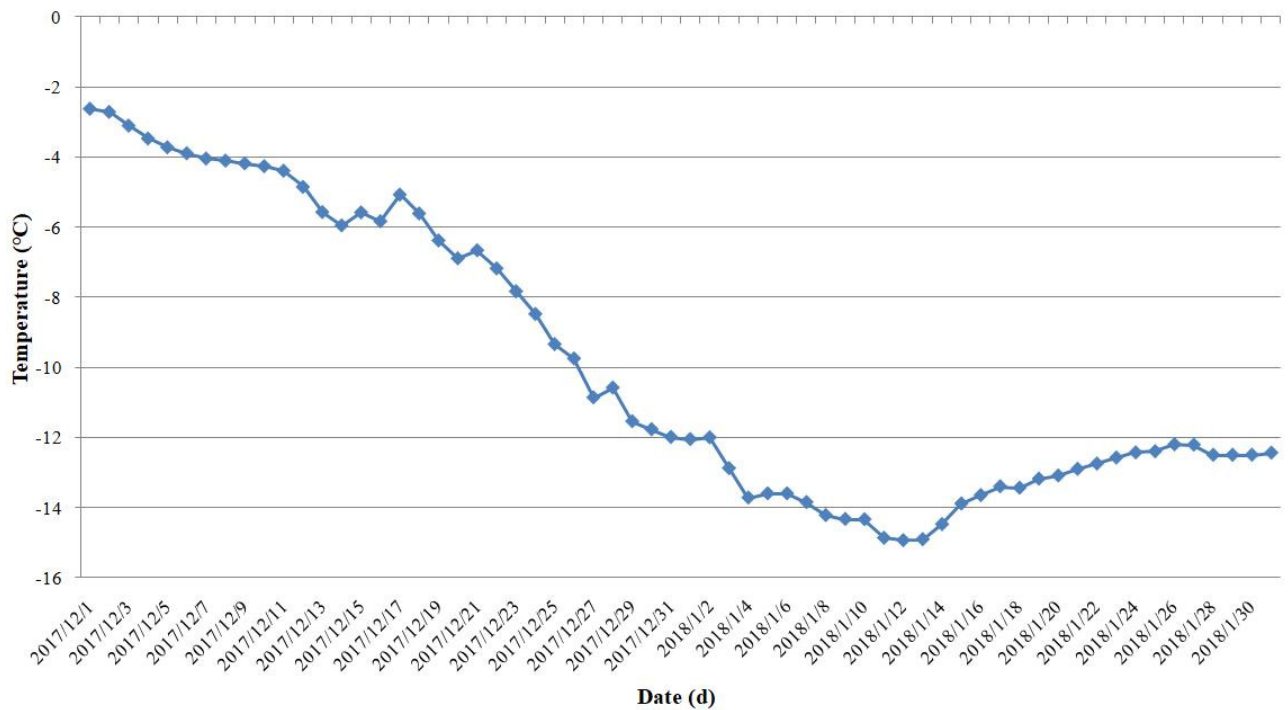

Figure S2. Changes of average temperatures at the 20 cm depth soil in December and January at the experiment site.

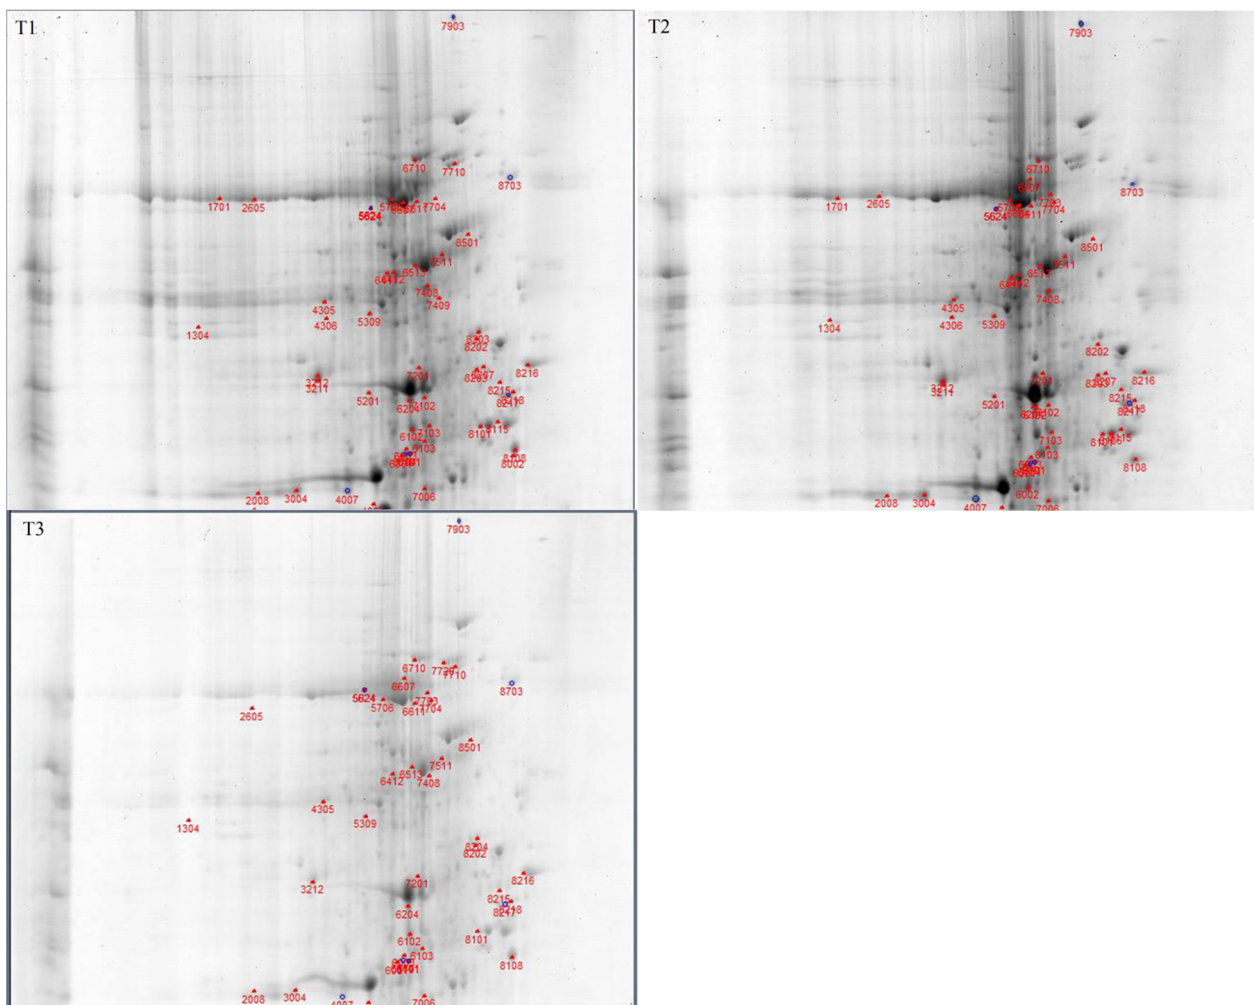

**Figure S3. The representative images of SDS-PAGE at different treatments.** Herein, T1: *V. riparia* × *V. labrusca* at -4°C; T2: *V. riparia* × *V. labrusca* at -15°C; and T3: Cabernet Sauvignon at -4°C.

## Table supplemental legends

**Table S1.**Thirty-six DEPs identified in T2 vs. T1.

| Protein Name                                                         | SwissProt ID | log <sub>2</sub> FC (T2 vs T1) |
|----------------------------------------------------------------------|--------------|--------------------------------|
| <b>Stress response (6)</b>                                           |              |                                |
| Dehydrin (DHN1)                                                      | Q4VT48       | 1.34                           |
| SHSP domain-containing protein (SHSPCP)                              | F6HJZ4       | 1.76                           |
| Usp domain-containing protein (USPCP)                                | F6H727       | 1.60                           |
| Ferritin (FER)                                                       | A5BV73       | 2.83                           |
| Glutaredoxin-dependent peroxiredoxin (GluDP)                         | A5ARL2       | 2.72                           |
| Glutathione peroxidase (GPX)                                         | D7TW03       | 1.28                           |
| <b>Bio-signaling (4)</b>                                             |              |                                |
| Protein kinase domain-containing protein (PKCP)                      | A5ALY7       | 1.44                           |
| Serine/threonine-protein phosphatase (S/TPP)                         | D7TV73       | 1.98                           |
| Non-specific serine/threonine protein kinase (nsS/TPK)               | F6H1V3       | 1.75                           |
| Ubiquitin receptor RAD23 (RAD23)                                     | D7T959       | 1.22                           |
| <b>Metabolism (7)</b>                                                |              |                                |
| Alpha-1,4 glucan phosphorylase (GluP)                                | D7SXJ4       | 2.65                           |
| 1,4-alpha-glucan branching enzyme (GluBE)                            | E0CQR2       | 0.58                           |
| Pectinesterase (PE)                                                  | F6HZ64       | 0.63                           |
| Abhydrolase 3 domain-containing protein (ABHD3CP)                    | F6HQC6       | 0.84                           |
| Proline iminopeptidase (ProIP)                                       | D7T3J3       | 2.28                           |
| Methyltransferase (MT)                                               | A5B620       | 2.61                           |
| Ubiquitin carboxyl-terminal hydrolase                                | F6H2F7       | -1.63                          |
| <b>Energy (6)</b>                                                    |              |                                |
| ADP/ATP carrier protein (AAC)                                        | A5BVR2       | 1.63                           |
| AAA domain-containing protein (AAACP)                                | D7TZI9       | 1.61                           |
| NAD(P)-bd dom domain-containing protein (NADCP)                      | F6HL96       | 1.59                           |
| NADH dehydrogenase [ubiquinone] 1 beta subcomplex subunit 7 (NDUFB7) | A5BAM7       | 1.82                           |
| Phytocyanin domain-containing protein (PCP)                          | A5C3C3       | 1.85                           |
| Succinate dehydrogenase [ubiquinone] flavoprotein subunit (SDHFS)    | A5BGN3       | 1.69                           |
| <b>Translation (3)</b>                                               |              |                                |
| Ribosomal protein L14 (rpL14)                                        | B6VJZ7       | 2.61                           |
| 40S ribosomal protein S21 (rpS21)                                    | A5BUA6       | 2.76                           |
| Peptidylprolyl isomerase (PPI)                                       | D7UDY0       | 1.61                           |
| <b>Transport (1)</b>                                                 |              |                                |
| Tubulin alpha chain                                                  | A5BZF5       | -1.60                          |
| <b>Uncharacterized protein (9)</b>                                   |              |                                |
| Uncharacterized protein                                              | F6HSH9       | -1.65                          |
| Uncharacterized protein                                              | F6HNS2       | -1.97                          |
| Uncharacterized protein                                              | F6GV46       | -2.74                          |
| Uncharacterized protein                                              | D7TA50       | -1.76                          |
| Uncharacterized protein                                              | D7TVM3       | -2.67                          |
| Uncharacterized protein                                              | D7T1V9       | 1.42                           |
| Uncharacterized protein                                              | F6HUZ8       | 1.88                           |
| Uncharacterized protein                                              | F6HUA8       | 1.60                           |
| Uncharacterized protein                                              | A5AQ98       | -1.59                          |

**Table S2.** Fifty-seven DEPs identified in T1 vs.T3.

| Protein Name                                                         | SwissProt ID | log <sub>2</sub> FC (T1 vs T3) |
|----------------------------------------------------------------------|--------------|--------------------------------|
| <b>Stress response (10)</b>                                          |              |                                |
| Dehydrin (DHN1)                                                      | Q4VT48       | 1.78                           |
| SHSP domain-containing protein (SHSPCP)                              | F6HJZ4       | 2.01                           |
| Usp domain-containing protein (USPCP)                                | F6H727       | 2.69                           |
| Ferritin (FER)                                                       | A5BV73       | 1.83                           |
| Glutaredoxin-dependent peroxiredoxin (GluDP)                         | A5ARL2       | 1.92                           |
| Glutathione peroxidase (GPX)                                         | D7TW03       | 1.73                           |
| Pathogenesis-related protein 10.3                                    | B7SL50       | -1.03                          |
| Peroxidase                                                           | D7SJL8       | -1.14                          |
| PKS_ER domain-containing protein                                     | D7TVV9       | 1.08                           |
| Stress-response A/B barrel domain-containing protein                 | A5C6X0       | -1.06                          |
| <b>Bio-signaling (5)</b>                                             |              |                                |
| Protein kinase domain-containing protein (PKCP)                      | A5ALY7       | 1.27                           |
| Serine/threonine-protein phosphatase (S/TPP)                         | D7TV73       | 2.92                           |
| Non-specific serine/threonine protein kinase (nsS/TPK)               | F6H1V3       | 2.07                           |
| Ubiquitin receptor RAD23 (RAD23)                                     | D7T959       | 1.35                           |
| Bet_v_1 domain-containing protein                                    | A5C110       | 1.05                           |
| <b>Metabolism (14)</b>                                               |              |                                |
| Alpha-1,4 glucan phosphorylase (GluP)                                | D7SXJ4       | 1.36                           |
| 1,4-alpha-glucan branching enzyme (GluBE)                            | E0CQR2       | 1.57                           |
| Pectinesterase (PE)                                                  | F6HZ64       | 2.92                           |
| Abhydrolase 3 domain-containing protein (ABHD3CP)                    | F6HQC6       | 1.21                           |
| Proline iminopeptidase (ProIP)                                       | D7T3J3       | 1.94                           |
| Methyltransferase (MT)                                               | A5B620       | 1.75                           |
| AAI domain-containing protein                                        | D7SLG6       | -1.31                          |
| Aldo_ket_red domain-containing protein                               | D7TUK1       | 1.44                           |
| Fn3_like domain-containing protein                                   | F6H0V8       | 1.45                           |
| Inositol-3-phosphate synthase                                        | D7SVZ9       | 1.09                           |
| PCI domain-containing protein                                        | D7TVK9       | 1.23                           |
| PfkB domain-containing protein                                       | A5B8T3       | 1.19                           |
| Dirigent protein                                                     | A5B702       | -1.44                          |
| Isoflavone reductase-like protein 5                                  | Q3KN68       | 1.16                           |
| <b>Energy (7)</b>                                                    |              |                                |
| ADP/ATP carrier protein (AAC)                                        | A5BVR2       | 1.61                           |
| AAA domain-containing protein (AAACP)                                | D7TZI9       | 1.59                           |
| NAD(P)-bd dom domain-containing protein (NADCP)                      | F6HL96       | 2.06                           |
| NADH dehydrogenase [ubiquinone] 1 beta subcomplex subunit 7 (NDUFB7) | A5BAM7       | 2.61                           |
| Phytocyanin domain-containing protein (PCP)                          | A5C3C3       | 2.83                           |
| Succinate dehydrogenase [ubiquinone] flavoprotein subunit (SDHFS)    | A5BGN3       | 1.88                           |
| Complex1_30kDa domain-containing protein                             | A5AED5       | 1.66                           |
| <b>Translation (5)</b>                                               |              |                                |
| Ribosomal protein L14 (rpL14)                                        | B6VJZ7       | 2.80                           |
| 40S ribosomal protein S21 (rpS21)                                    | A5BUA6       | 1.67                           |
| Peptidylprolyl isomerase (PPI)                                       | D7UDY0       | 2.51                           |
| Caffeoyl-CoA O-methyltransferase                                     | A2TDB3       | -1.65                          |
| M16C_associated domain-containing protein                            | F6HQC5       | -2.80                          |

|                                                      |        |       |
|------------------------------------------------------|--------|-------|
| <b>Transcription (1)</b>                             |        |       |
| Integrase catalytic domain-containing protein        | A5BVQ3 | 1.01  |
| <b>Transport (2)</b>                                 |        |       |
| Cytochrome b5 heme-binding domain-containing protein | A5C997 | -1.14 |
| HMA domain-containing protein                        | F6HV23 | -1.07 |
| <b>Uncharacterized (13)</b>                          |        |       |
| CAAD domain-containing protein                       | A5AEL3 | -1.62 |
| NmrA domain-containing protein                       | E0CQE7 | 1.69  |
| VOC domain-containing protein                        | A5B1M7 | -1.60 |
| 14_3_3 domain-containing protein                     | F6H2P0 | -1.67 |
| X8 domain-containing protein                         | D7SI17 | -1.66 |
| Uncharacterized protein                              | A5BL97 | -1.49 |
| Uncharacterized protein                              | A5AT21 | -1.26 |
| Uncharacterized protein                              | D7U7W7 | 1.04  |
| Uncharacterized protein                              | F6H471 | -1.58 |
| Uncharacterized protein                              | F6HJM9 | 1.48  |
| Uncharacterized protein                              | D7TYU4 | -1.21 |
| Uncharacterized protein                              | D7TZW2 | -1.23 |
| Uncharacterized protein                              | A5B6D2 | -1.17 |
